# 1 Performance assessment of total RNA sequencing of 2 human biofluids and extracellular vesicles

3 Celine Everaert <sup>1,2,†</sup>, Hetty Helsmoortel <sup>1,2,†</sup>, Anneleen Decock <sup>1,2</sup>, Eva Hulstaert <sup>1,2,3</sup>, Ruben Van  
4 Paemel <sup>1,2</sup>, Kimberly Verniers <sup>1,2</sup>, Justine Nuytens <sup>1,2</sup>, Jasper Anckaert <sup>1,2</sup>, Nele Nijs <sup>4</sup>, Joeri Tulkens  
5 <sup>2,5</sup>, Bert Dhondt <sup>2,5,6</sup>, An Hendrix <sup>2,5</sup>, Pieter Mestdagh <sup>1,2</sup> and Jo Vandesompele <sup>1,2,4\*</sup>

6  
7 <sup>1</sup> Center for Medical Genetics, Department of Biomolecular Medicine, Ghent University, Ghent, Belgium

8 <sup>2</sup> Cancer Research Institute Ghent, Ghent, Belgium

9 <sup>3</sup> Department of Dermatology, Ghent University Hospital, Ghent, Belgium

10 <sup>4</sup> Biogazelle, Zwijnaarde, Belgium

11 <sup>5</sup> Laboratory of Experimental Cancer Research, Department of Human Structure and Repair, Ghent  
12 University, Ghent, Belgium

13 <sup>6</sup> Department of Urology, Ghent University Hospital, Ghent, Belgium

14

15 † These authors contributed equally to this work

16 \* Correspondence: [jo.vandesompele@ugent.be](mailto:jo.vandesompele@ugent.be); Tel.: +32 9 332 1381

17

18 **Abstract:** RNA profiling has emerged as a powerful tool to investigate the biomarker potential of  
19 human biofluids. However, despite enormous interest in extracellular nucleic acids, RNA  
20 sequencing methods to quantify the total RNA content outside cells are rare. Here, we evaluate the  
21 performance of the SMARTer Stranded Total RNA-Seq method in human platelet-rich plasma,  
22 platelet-free plasma, urine, conditioned medium, and extracellular vesicles (EVs) from these  
23 biofluids. We found the method to be accurate, precise, compatible with low-input volumes and  
24 able to quantify a few thousand genes. We picked up distinct classes of RNA molecules, including  
25 mRNA, lncRNA, circRNA, miscRNA and pseudogenes. Notably, the read distribution and gene  
26 content drastically differ among biofluids. In conclusion, we are the first to show that the SMARTer  
27 method can be used for unbiased unraveling of the complete transcriptome of a wide range of  
28 biofluids and their extracellular vesicles.

29 **Keywords:** total RNA sequencing, plasma, urine, conditioned medium, extracellular vesicles,  
30 biofluids, liquid biopsy, exosomes, cell-free RNA, extracellular RNA

31

## 32 1. Introduction

33

34 All human biofluids contain a multitude of extracellular nucleic acids, harboring a wealth of  
35 information about health and disease status. In addition to established non-invasive prenatal testing  
36 of fetal nucleic acids in maternal plasma<sup>1</sup>, liquid biopsies have emerged as a novel powerful tool in  
37 the battle against cancer<sup>2</sup>. Although in the past most attention was given to circulating DNA, its more  
38 dynamic derivative extracellular RNA may provide additional layers of information. However, RNA  
39 sequencing in biofluids is technically challenging. Low input amounts, large dynamic range, and  
40 (partial) degradation of RNA hamper straightforward quantification. While sequencing of small  
41 RNAs<sup>3</sup> and targeted or capture sequencing of longer RNAs<sup>4</sup> proved to be successful, studies using  
42 total RNA sequencing on biofluids are rare. To date, only a few whole transcriptome profiling  
43 attempts were made on urine, plasma or extracellular vesicles<sup>5-9</sup>, quantifying both polyadenylated  
44 and non-polyadenylated RNA transcripts. However, all these methods suffer from one or more  
45 limitations such as short fragment length, low amount of quantified genes or ribosomal RNA  
46 contamination.

47

48 The advantages of total RNA sequencing are plentiful. Indeed, detection is not limited to a set of pre-  
49 defined targets, nor to (3' ends of) polyadenylated RNAs. Next to polyadenylated mRNAs, various  
50 other RNA biotypes including circular RNAs, histone RNAs, and a sizable fraction of long non-  
51 coding RNAs can be distinguished. In addition, the study of posttranscriptional regulation is possible  
52 by comparing exonic and intronic reads<sup>10</sup>. Altogether, this generates a much more comprehensive  
53 view of the transcriptome.

54

55 Here we aimed to assess the performance of a strand-specific total RNA library preparation  
56 method for different types of biofluids and derived extracellular vesicles (EVs). We applied the  
57 method on platelet-rich plasma, platelet-free plasma, urine and conditioned medium from human  
58 healthy donors, cancer patients or cancer cells grown *in vitro*. More specifically, the SMARTer  
59 Stranded Total RNA-Seq Kit – Pico Input Mammalian, including a ribosomal RNA depletion step at  
60 the cDNA level, was extensively evaluated. We found the method to be accurate and precise. Low-  
61 input volumes are technically feasible and the method allows the detection of several thousand genes  
62 of different classes.

## 63 2. Results

### 64 2.1. Read distribution drastically differs among biofluids

65

66 In a first experiment (Fig 1A), we sequenced platelet-rich plasma (PRP) and platelet-free plasma (PFP)  
67 from two different healthy donors. We collected blood in EDTA tubes, hence the 'e' in front of ePRP  
68 and ePFP throughout the manuscript. From each plasma fraction, two technical RNA extraction  
69 replicates were performed, resulting in four sequenced samples per donor. Because of the low input,  
70 between 53.0% and 88.2% of the reads were PCR duplicates (SupFig1). PCR duplicates arise when  
71 multiple PCR products from the same original template molecule bind to the sequencing flow cell.  
72 For better quantitative accuracy, we removed the duplicates for further analysis. The variation in PCR  
73 duplicate levels between plasma fractions is related to the amount and quality of input RNA. As we  
74 will illustrate below, ePRP has a higher RNA input concentration, which explains the lower number  
75 of duplicate reads compared to ePFP. After duplicate removal we mapped the remaining  
76 (deduplicated) reads to the reference genome (Fig 2A). Four categories of reads can be distinguished  
77 here: uniquely mapping reads, multi-mapped reads aligning to several genomic positions, reads that  
78 are too short to map, and unmapped reads. The number of unmapped and multi-mapped reads was  
79 similar between plasma with and without platelets. However, ePFP samples contain much more  
80 reads that are too short to map. As a consequence, ePRP contains approximately twice as many  
81 uniquely mapped reads, possibly the result of more intact RNA in platelets. However, when only  
82 considering these unique reads, more than 75% of them derived from mitochondrial RNA (mtRNA)

83 in ePRP (Fig 2B). In contrast, ePFP contains at least three times less mtRNA and considerably more  
84 reads mapping to nuclear DNA. Finally, also the distribution between exonic, intronic and intergenic  
85 reads differs between platelet-rich and platelet-free plasma (Fig 2C).

86  
87 In the second experiment (Fig 1B), we sequenced conditioned medium from breast cancer cells (CM),  
88 platelet-free plasma from a third healthy donor collected in a citrate blood collection tube (cPFP) and  
89 urine from a prostate cancer patient. In addition, we purified EVs from these three fluids and  
90 performed extensive quality control using western blot, electron microscopy and nanoparticle  
91 tracking analysis (SupFig2). We sequenced the EV samples together with their fluids of origin. For  
92 this experiment, two technical replicates were introduced at the level of library preparation for each  
93 condition, resulting in 12 libraries. Because only one biological sample of each biofluid was included  
94 in this experiment, we should be cautious when generalizing differences among biofluids. With the  
95 exception of plasma, the number of PCR duplicates is lower in EVs compared to their parental  
96 biofluid (SupFig1). As mentioned earlier, the levels of PCR duplicates are typically lower in samples  
97 with higher input quality and concentration. But, as we will see in the next paragraph, RNA input  
98 amounts in EVs are not higher compared to their fluid of origin. Another explanation, at least partly,  
99 could be the protective effect lipid bilayers have on the quality of their RNA cargo. Interestingly, also  
100 mapping rates can differ substantially among biofluids and/or their EVs (Fig 2A). In our setup for  
101 instance, the fraction of unique reads ranges from 7.69% in cPFP EVs to 90.2% in EVs isolated from  
102 conditioned medium. When looking at the mapping properties of the unique reads, almost all  
103 samples mainly contain reads that map to nuclear DNA (Fig 2B). Only platelet-free plasma contains  
104 25.8% mitochondrial RNA, comparable to the percentages that were generated in the healthy donors  
105 of the first experiment. Lastly, most reads mapping to nuclear DNA are exonic. The only exception  
106 here are cPFP EVs that contain a larger fraction of intronic and intergenic reads (Fig 2C). While the  
107 platelet-free plasma samples in the first and second experiment seem very similar, small differences  
108 may be introduced by blood collection tube (EDTA vs. citrate) and/or the use of distinct donors.  
109 Indeed, also in the first experiment the read distribution was to some extent donor dependent.

110  
111 We subsequently investigated two other technical characteristics of our biofluid total RNA seq  
112 method: the level of strandedness and the inner distance between paired-end reads. In general, the  
113 method generates strand-specific sequencing reads in all the biofluids we assessed (SupFig3). The  
114 cDNA fragment sizes in the library range from 70 to 400 nucleotides, with a peak around 90  
115 nucleotides for the plasma samples and around 180-190 nucleotides for the other samples. Notably,  
116 the plasma samples and derived EVs present with the shortest fragment length (SupFig4). In  
117 conclusion, we show for the first time that the SMARTer Stranded Total RNA-Seq method works in  
118 different human biofluids and their respective EVs. The method generates reproducible read  
119 distribution results for technical replicates, both at the RNA isolation and library preparation level.  
120 The results clearly differ according to biofluid sample type.

121

## 122 2.2. Spike-in RNA enables relative RNA quantification and fold change trueness assessment

123

124 In order to assess the quantitative aspect of the total RNA sequencing method, we added an ERCC  
125 RNA spike-in mix to all RNA samples prior to library preparation in the experiments above. The  
126 addition of spike-in RNA is effective as processing control when working with challenging and low  
127 input material, and can be used to normalize sequencing reads or calculate input RNA amounts. In  
128 addition, the correlation values between the expected and observed relative quantities of the spikes  
129 can be calculated. The high correlation in our experiments indicate excellent recovery of the ERCC  
130 spike-in mix during the entire library preparation and sequencing workflow in all samples but the  
131 conditioned medium (SupFig5).

132

133 As there is an inverse relationship between the number of spike-in RNA reads and the number of  
134 endogenous RNA reads, the ratio between the sum of the reads consumed by the endogenous

135 transcripts and the total number of spike-in reads is a relative measure for the RNA concentration of  
136 the various samples. When adding the same amount of ERCC RNA to all samples, a higher ratio is  
137 indicative of more endogenous RNA. We found the highest RNA extraction concentration in  
138 conditioned medium, and the lowest in plasma EVs (SupFig6). Of note, not all starting volumes  
139 before EV purifications or other handling were equal. For instance, in our urine experiment we  
140 compare RNA extracted from 200 uL whole urine with RNA isolated from EVs that were present in  
141 45 mL whole urine as starting material. Therefore, we corrected the endogenous:ERCC ratios for the  
142 original input volumes. This provides us information about the relative amount of RNA present per  
143 milliliter biofluid (Fig 3A). While ePRP, conditioned medium and urine have very similar RNA  
144 concentrations, ePFP and cPFP contain approximately 17 times less RNA. In addition, EVs from  
145 condition medium hold 2763 times less RNA compared to their fluid of origin, plasma EVs 616 times  
146 less and urine EVs 7.6 times less. Given that only one biological sample was included in this  
147 experiment, further studies warranted to validate these differences in RNA concentration.  
148

149 In a separate experiment, we added two different spike-in mixes in varying amounts to five identical  
150 ePFP samples from a fourth healthy donor. Sequin spikes (n=78) and ERCC spikes (n=92) were diluted  
151 in opposite order by a factor 1.41 in the five derivative samples. In this way, a biologically relevant 4-  
152 fold dynamic range for both Sequin and ERCC spikes was covered (Fig 1C). The aim of this  
153 experiment was to assess the method's trueness by comparing expected and observed fold changes  
154 of the 170 sequenced spike-in RNAs. Of note, both Sequin and ERCC spike mixes consist of multiple  
155 RNA molecules present in varying concentrations. Based on pre-experiments, we made sure that we  
156 added the spikes in such amounts that the number of reads going to the spikes with the highest  
157 concentration (for both the Sequin and ERCC panel) was lower than the number of reads going to the  
158 10<sup>th</sup> highest abundant endogenous gene. Only by aiming for coverage in the biofluid abundance  
159 range, one is able to assess the accuracy of biologically relevant differences. The results indicate how  
160 reliably fold changes can be detected using our total RNA seq method. Overall, there is a strong  
161 correlation between the expected and observed fold changes, with ERCC spikes (slope=0.975,  
162 adjusted R<sup>2</sup>= 0.67) behaving slightly better than Sequin spikes (slope=0.895, adjusted R<sup>2</sup>= 0.78) since  
163 the slope is expected to be '1' (Fig 3B). Notably, larger variations arise when assessing smaller fold  
164 changes. Indeed, the lower the fold change, the bigger the spread in datapoints in the violin plot. We  
165 investigated this observation in more detail and found that deviation from the expected value is  
166 larger for spikes with fewer counts (Fig 3C). In order to reliably measure small fold changes, it  
167 appears that a minimal number of 10 counts is advisable. Importantly, for about 90% of the spikes  
168 the deviation between the observed and expected log<sub>2</sub> fold change is smaller than 0.5. This is shown  
169 in the cumulative distribution plot, where a minimum of 87.3% (for a log<sub>2</sub> fold change difference of  
170 1) and a maximum of 91.4 % (for a difference of 2) of the spikes show a deviation from the expected  
171 value of maximum 0.5 (Fig 3D). This indicates that the worst measurement for about 90% of the spikes  
172 is wrong with only a factor 1.41. What is more, almost all spikes can be measured within an error of  
173 a factor 2. In conclusion, although very small fold changes and fold changes of lower abundant  
174 transcripts are somewhat more difficult to detect, the method is reliable and approximates true fold  
175 changes very well.  
176

### 177 2.3. The total RNA seq method is reproducible

178

179 As indicated above, technical replicates of the e PRP and ePFP samples were prepared at the level of  
180 RNA isolation. Scatter plots of the read counts clearly show that gene counts are reproducible  
181 between independent RNA extractions of the same plasma sample (Fig 4). In addition, we generated  
182 cumulative distribution plots that display the fold change of every gene when comparing RNA  
183 isolation replicates (Fig 5A). The area left of the curve (ALC) indicates the precision of the method,  
184 with lower values demonstrating better replication. Indeed, the more the curves are shifted to the  
185 left, the smaller the differences between two replicates and thus the smaller the ALC value. In  
186 biological terms, this means that half of the genes can be detected with a fold change smaller than the

187 ALC value. To illustrate, in ePRP of donor 2 half of the genes show a fold change less than 1.32  
188 between both replicates ( $\log_2$  fold change of 0.403, indicated in Fig 5C). Cumulative distribution plots  
189 for the experiment with conditioned medium, citrate plasma, urine and their respective EVs (Fig 5B).  
190 show slightly lower ALC values, indicating that reproducibility is better when replication is  
191 introduced at the level of library preparation (Fig 5C).

192

193 2.4. Transcriptomes are widely different among tested biofluids

194

195 To assess the inherent variation of the various transcriptomes, we clustered all plasma, urine,  
196 conditioned medium and EV samples in a t-SNE plots (SupFig7). This plot confirms good  
197 reproducibility among technical replicates. Notably, EVs isolated from healthy donor plasma and  
198 cancer cell conditioned medium seem to be quite similar. In contrast, urinary EVs do not cluster with  
199 these EVs, but show more similarity to whole urine. Next, when assessing the number of  
200 reproducibly detected genes (mRNA, lncRNA, miscRNA pseudogenes and others), ePFP samples  
201 contain more genes compared to ePRP (Fig 6A). This is probably due to lower amounts of (very  
202 abundant) mitochondrial RNA in ePFP, hence freeing up sequencing power to detect more genes. In  
203 addition, the 20 most abundant genes consume approximately 75% of the reads in ePRP,  
204 automatically leading to less diversity in the remaining gene fraction (Fig 6B). The highest abundant  
205 genes in PRP are MTRNR2 (or paralogues), MTND1 and MTND2, which are all transcribed from  
206 mitochondrial DNA, as are many other genes in the top-20 (SupFig8). Urine and urinary EVs contain  
207 more than 10,000 genes in our experimental setup, the highest number of all evaluated biofluids (Fig  
208 6C). The lowest number of genes was observed in healthy donor citrate plasma derived EVs, in which  
209 only 904 genes could be detected using our total RNA seq method. Interesting to note is that plasma  
210 EVs had the worst mapping qualities of all samples (see Fig 2A above). An important remark is that  
211 one should be cautious when interpreting the results above. Indeed, simply comparing gene numbers  
212 among different biofluids is difficult because of varying input volumes used for RNA purification.  
213 As already exemplified above, in the urine experiment we compare RNA extracted from 200  $\mu$ L  
214 whole urine with RNA isolated from EVs that were present in 45 mL whole urine as starting material.  
215 To get further insights in the technical performance of the total RNA seq method, we also assessed  
216 the distribution of the counts (SupFig9) and the gene body coverage (SupFig10). In fragmented RNA,  
217 the coverage at the 5' and 3' end of the gene body is typically lower compared to the middle part.

218

219 We further investigated five different gene biotypes in all samples, according to their annotation in  
220 Ensembl (protein coding genes, lncRNA genes, miscellaneous RNA genes, pseudogenes and other  
221 genes). The percentage of counts assigned to these five gene types differs among the biofluids. ePRP  
222 for instance contains high number of pseudogene reads, resulting from mitochondrial genes as  
223 illustrated above, whereas ePFP mainly consists of reads mapping to protein coding genes (Fig 7A).  
224 The differences in the other samples are less explicit. Looking into the top-20 genes with the highest  
225 counts reveals the genes consuming most of the reads in each sample (SupFig8). We also calculated  
226 the absolute numbers per gene biotype, but again we should keep in mind the difficulty in side-by-  
227 side comparisons because of differing input volumes (Fig 7B-C). What we can conclude is that the  
228 method is able to pick up many different classes of RNA molecules.

229

230 Next to Ensembl, we also assessed the reads mapping to LNCipedia<sup>11</sup>, the most comprehensive  
231 database of human long non-coding RNAs (Fig 8A). In analogy with the results above, the largest  
232 number of lncRNAs was found in urine and urinary EVs. Indeed, approximately 3000 lncRNA genes  
233 can be distinguished in EVs isolated from urine. cPFP contains around 1500 lncRNAs, while we could  
234 detect almost no lncRNAs in EVs isolated from this plasma. As expected, ePFP contains more  
235 lncRNAs than ePRP. In addition, also the presence of circular RNAs was assessed. Their overall  
236 number is low, but especially cPFP and urinary EVs show substantially more circular RNAs (Fig 8B).  
237 CircRNAs are presumed to be more stable and less degraded compared to linear forms. Therefore,  
238 they are ideal candidates for cancer biomarker discovery studies.

239

240

## 2.5. Evaluating biological differences in RNA content among biofluids

241

242

243

244

245

246

247

248

249

250

251

252

253

254

255

256

257

258

259

260

261

262

263

In order to illustrate which biological insights total RNA seq results can yield, we compared gene abundance in ePRP and ePPF samples (SupFig11A). An Euler diagram indicates the number of genes that are unique to each plasma fraction, and the number of overlapping genes (SupFig11B). Studies like this (but with many more samples in each biofluid group) could lead to new insights into selective RNA cargo filling of extracellular vesicles. Here, we compared RNA abundance profiles between EVs and their biofluids of origin. Euler diagrams represent the number of overlapping and unique genes per pair of samples (Fig 9A-C). Conditioned medium, for instance, shares 4891 genes (Jaccard index of 0.652) with the EVs it contains. Further, 1853 genes are only present in EVs while 755 genes are unique to conditioned medium only. The results in plasma are markedly different: plasma EVs contain 1598 genes, 70 of which are unique to EVs. RNA isolated from whole citrate plasma on the other hand contains 7211 genes, nearly five times more, despite 30-fold lower input volume. Urine and urinary EVs finally have more than 10,000 genes in common and contain 521 and 900 unique genes respectively. In addition, using scatter plots we represent the similarity between abundances in EVs and their fluid of origin in another way (Fig 9D-E). Supporting the results above, urine and urinary EVs have a great concordance in abundance of genes while citrate plasma and plasma EVs differ most from each other. Note that most of the EV-unique genes (indicated with dark blue dots) are low abundant. This could be due to chance (sampling effect) and sequencing deeper or using more input material may reduce this set of unique genes. In the same plot, we also indicated the count level of all genes uniquely present in one of both samples with colored lines. Notably, genes present in EVs but absent from their biofluid of origin typically consume a lower number of counts. Digging deeper into biological analyses using bigger cohorts, from gene set enrichment to pathway analysis, may reveal novel insights.

264

## 3. Discussion

265

266

267

268

269

270

271

272

273

274

275

276

277

278

279

280

281

282

283

284

285

286

287

288

289

Extracellular RNA content analysis of human biofluids and extracellular vesicles may provide insights into their biogenesis and reveal biomarkers for health and disease. There are currently four types of sequencing-based total RNA profiling of such challenging clinical samples: 1) the recent modified small RNA sequencing methods<sup>8,9</sup>, 2) the SOLiD total RNA sequencing method<sup>12</sup>, 3) the Ion Proton method<sup>13</sup> and 4) TGIRT-sequencing using thermostable group II intron reverse transcriptases<sup>5</sup>. The SMARTer method assessed in our study adds a fifth promising method to the sequencing armory. In addition, the SMARTer method avoids limitations linked to other methods such as short fragment length, low amount of quantified genes or ribosomal RNA contamination.

While not marketed for this application, extensive technical performance assessment demonstrated that the SMARTer Stranded Total RNA-Seq method to be an accurate, precise and sensitive method to quantify total RNA in human biofluids. Notable differences among plasma, urine, conditioned medium and their EVs could be related to the biology of each fluid and should be taken into account when setting up biomarker studies. Possible improvements to profile platelet-rich plasma from EDTA tubes could be made by designing probes that remove mitochondrial ribosomal RNA, shown to be highly abundant (and unwanted) in this type of plasma. In this way, read diversity should increase and more genes at lower abundance will be identified. Quite striking was the observation that EVs from platelet-free citrate plasma contain substantially fewer genes. Whether the workflow can be optimized for plasma EVs definitely is a subject for further research. Besides, treatment of EVs with RNases to remove any non-encapsulated RNA may also prove useful<sup>14</sup>.

It has been shown that pre-analytical variables may have an effect on the resulting RNA profiles<sup>15</sup>. In our study, we also observed differences between ePPF and cPPF, which are identical biofluids collected in different blood tubes and prepared with a slightly different centrifugation protocol. In

290 general, differences in pre-analytical variables such as blood collection tubes, processing time,  
291 centrifugation speeds, RNA isolation kit, and freeze-thaw cycles could well be responsible for great  
292 variation in RNA sequencing results. Systematic evaluation of the impact of pre-analytical variables  
293 would definitely be of huge added value to progress the fields of extracellular RNA research and  
294 liquid biopsies.

295

296 In our study we included synthetic spike-in RNA mixes to control for variation during RNA isolation  
297 and/or library preparation. Of note, we did not include spikes during RNA isolation of EVs and their  
298 biofluids or origin because we did not include replicates at the RNA level. Ideally however, both  
299 Sequin spikes<sup>16</sup> during RNA extraction and ERCC spikes before library preparation are added in all  
300 RNA sequencing experiments to control for different types of technical variation. As data  
301 interpretation is often complex in experiments involving different biofluids and input volumes,  
302 spike-in RNA could help with normalization, clarification and assimilation of raw data.

303

304 Finally, nuclear acids present in all sorts of biofluids and their EVs are promising biomarkers for  
305 diagnosis, prognosis, therapy response and monitoring of disease. The advantage of the SMARTer  
306 Stranded Total RNA-Seq method is its potential to process low amounts of input material. Indeed,  
307 collecting samples is often the bottleneck of fundamental, (pre)clinical and translational research  
308 projects and being able to disseminate large amounts of information from only 200  $\mu$ L (or less) can  
309 substantially impact research progress.

310

## 311 4. Materials and Methods

312

### 313 4.1 Sample collection

314

#### 315 4.1.1. ePRP and ePFP collection

316

317 For the first experiment, venous blood was drawn from an elbow vein of two healthy donors in 3  
318 EDTA tubes (BD Vacutainer Hemogard Closure Plastic K2-Edta Tube, 10 ml, #367525) using the BD  
319 Vacutainer Push blood collection set (21G needle). Collection of blood samples was according to the  
320 Ethical Committee of Ghent University Hospital approval EC/2017/1207 and written informed  
321 consent of the donors was obtained. The tubes were inverted 5 times and centrifuged within 15  
322 minutes after blood draw (400 g, 20 minutes, room temperature, without brake). Per donor, the upper  
323 plasma fractions were pipetted (leaving approximately 0.5 cm plasma above the buffy coat) and  
324 pooled in a 15 ml tube. After gently inverting, five aliquots of 220  $\mu$ l platelet-rich plasma (ePRP) were  
325 snap-frozen in 1.5 ml LoBind tubes (Eppendorf Protein LoBind microcentrifuge tubes Z666548 -  
326 DNA/RNA) in liquid nitrogen and stored at -80 °C. The remaining plasma was centrifuged (800 g, 10  
327 minutes, room temperature, without brake) and transferred to a new 15 ml tube, leaving  
328 approximately 0.5 cm plasma above the separation. This plasma was centrifuged a 3<sup>rd</sup> time (2500 g,  
329 15 minutes, room temperature, without brake), and transferred to a 15 ml tube, leaving  
330 approximately 0.5 cm above the separation. The resulting platelet-free plasma (ePFP) was gently  
331 inverted, snap-frozen in five aliquots of 220  $\mu$ l and stored at -80 °C. The entire plasma preparation  
332 protocol was finished in less than two hours. 200  $\mu$ l ePRP and ePFP was used for each RNA isolation.  
333 For the spike-in RNA titration experiment, the protocol was identical except for the fact that 4 EDTA  
334 tubes of 10 ml were drawn and that the second centrifugation step was different (1500 g, 15 minutes,  
335 room temperature, without brake).

336

#### 337 4.1.2 cPFP collection and EV isolation

338

339 Venous blood was collected using a 21G needle in 3.2% (w/v) sodium citrate tubes (MLS, Menen,  
340 Belgium) from an elbow vein of a healthy donor. Collection of blood samples was according to the  
341 Ethical Committee of Ghent University Hospital approval EC/2014/0655 and in accordance to

342 relevant guidelines. The participant had given written informed consent. Absence of hemolysis was  
343 confirmed by the lack of a spectrophotometric absorbance peak of free hemoglobin at 414 nm using  
344 a BioDrop DUO spectrophotometer (BioDrop Ltd, Cambridge, United Kingdom). The blood tubes  
345 were inverted 5 times and plasma was prepared by centrifugation (2500 g with brake, 15 minutes,  
346 room temperature). The upper plasma fraction was collected (leaving approximately 0.5 cm plasma  
347 above the buffy coat layer) and transferred to a new 15 ml tube. Platelet-depleted plasma was  
348 prepared by centrifugation (2500 g with brake, 15 minutes, room temperature). Platelet-depleted  
349 plasma was collected (leaving approximately 0.5 cm plasma above the bottom of the tube), aliquoted  
350 per 1.5 ml in 2 ml cryo-vials and stored at -80 °C. To ensure the depletion of platelets in plasma we  
351 used the XP-300 Hematology Analyzer (Sysmex, Hoeilaart, Belgium). The blood sample was  
352 processed within 120 min after blood collection. 200 µl plasma was used for RNA isolation.

353  
354 A combination of size exclusion chromatography (SEC) and OptiPrep density gradient (DG)  
355 centrifugation was used to isolate EV from plasma. Sepharose CL-2B (GE Healthcare, Uppsala,  
356 Sweden, #17014001) was washed 3 times with PBS (Merck Millipore, Billerica, Massachusetts, USA)  
357 containing 0.32 % (w/v) trisodiumcitrate dihydrate (ChemCruz, Dallas, Texas, USA)<sup>17</sup>. For  
358 preparation of the SEC column, nylon filter with 20 µm pore size (Merck Millipore, Billerica,  
359 Massachusetts, USA) was placed on bottom of a 10 ml syringe (Romed, Wilnis, The Netherlands),  
360 followed by stacking of 10 ml Sepharose CL-2B. On top of three SEC columns, 6 ml plasma was loaded  
361 (2 ml per column) and fractions of 1 ml eluate were collected. SEC fractions 4, 5 and 6 were pooled  
362 and concentrated to 1 ml using 10 kDa centrifugal filter (Amicon Ultra-2ml, Merck Millipore,  
363 Billerica, Massachusetts, USA). The resulting 1 ml sample was loaded on top of a DG, as previously  
364 described<sup>18</sup>. This discontinuous iodixanol gradient was prepared by layering 4 ml of 40 %, 4 ml of 20  
365 %, 4 ml of 10 % and 3.5 ml of 5 % iodixanol in a 17 ml Thinwall Polypropylene Tube (Beckman  
366 Coulter, Fullerton, California, USA). The DG was centrifuged 18 h at 100,000 g and 4 °C using SW  
367 32.1 Ti rotor (Beckman Coulter, Fullerton, California, USA). Density fractions of 1 ml were collected  
368 and fractions 9-10 pooled. An additional SEC was performed on the pooled density fraction to  
369 remove iodixanol<sup>19</sup>. SEC fractions 4-7 were pooled and concentrated to 100 µl and stored at -80 °C  
370 until further use. Samples were further diluted to 200 µl in PBS prior to RNA isolation.

#### 371 372 *4.1.3 Urine collection and EV isolation*

373  
374 One whole urine sample was collected from a prostate cancer patient prior to local treatment. Sample  
375 collection was according to the Ethical Committee of Ghent University Hospital approval  
376 EC/2015/0260 and in accordance to relevant guidelines. The participant had given written informed  
377 consent. The urine sample was collected immediately following digital rectal examination (DRE).  
378 DRE was performed as 3 finger strokes per prostate lobe. The urine sample was centrifuged for 10  
379 minutes at 1000 g and 4 °C in accordance with the Eurokup/HKUPP Guidelines. Cell-free urine  
380 supernatants were collected (leaving approximately 0.5 cm urine above the cell pellet) and stored at  
381 -80 °C in 1.7 ml SafeSeal Microcentrifuge Tubes (Sorenson Bioscience) until further use. 200 µl urine  
382 was used for RNA isolation.

383  
384 The cell-free urine sample (45 ml) was thawed at room temperature and vortexed extensively before  
385 being concentrated to 800 µl using a 10 kDa centrifugal filter device (Centricon Plus-70, Merck  
386 Millipore, Massachusetts, USA). The concentrated urine sample was resuspended in 3.2 ml of a 50%  
387 iodixanol solution and layered on the bottom of a 17 ml Thinwall Polypropylene Tube (Beckman  
388 Coulter, Fullerton, California, USA). A discontinuous DG was prepared by additional layering of  
389 4 ml of 20%, 4 ml of 10% and 3.5 ml of 5% iodixanol, and 1 ml PBS on top of the urine suspension. The  
390 DG was centrifuged 18 h at 100,000 g and 4 °C using SW 32.1 Ti rotor (Beckman Coulter, Fullerton,  
391 California, USA). Density fractions of 1 ml were collected and fractions 9-10 pooled. An additional  
392 SEC was performed on the pooled density fraction to remove iodixanol. SEC fractions 4-7 were



393 pooled and concentrated to 100  $\mu$ l and stored at -80 °C until further use. Samples were further diluted  
394 in PBS to 200  $\mu$ l for RNA isolation.

395

396

397

#### 4.1.4 MCF-7 GFP-Rab27b conditioned medium and EV isolation

398 The MCF-7 cell line (ATCC, Manassas, VA, USA) was stably transfected with peGFP-C1 vector  
399 (Clontech, Mountain View, California, USA) containing the GFP-Rab27b fusion protein, as previously  
400 described (MCF-7 GFP-Rab27b)<sup>20</sup>. MCF-7 GFP-Rab27b cells were cultured in Dulbecco's Modified  
401 Eagle Medium supplemented (DMEM) with 10 % fetal bovine serum, 100 U/ml penicillin, 100  $\mu$ g/ml  
402 streptomycin and 1 mg/ml G418. Presence of mycoplasma was routinely tested using MycoAlert  
403 Mycoplasma Detection Kit (Lonza, Verviers, Belgium). To prepare conditioned medium (CM),  $4 \times 10^8$   
404 MCF-7 GFP-Rab27b cells (20 X 175 cm<sup>2</sup> flasks, 300 ml) were washed once with DMEM, followed by  
405 two washing steps with DMEM supplemented with 0.5 % EV-depleted fetal bovine serum (EDS).  
406 EDS was obtained after 18 h ultracentrifugation at 100,000 g and 4 °C (SW55 Ti rotor, Beckman  
407 Coulter, Fullerton, California, USA), followed by 0.22  $\mu$ m filtration. Flasks were incubated at 37 °C  
408 and 10 % CO<sub>2</sub> with DMEM containing 0.5% EDS. After 24 h, CM was collected and centrifuged for 10  
409 min at 200 g and 4 °C. Cell counting was performed with trypan blue staining to assess cell viability  
410 (Cell Counter, Life Technologies, Carlsbad, California, USA). The supernatant was passed through a  
411 0.45  $\mu$ m cellulose acetate filter (Corning, New York, USA) and CM was concentrated to 1 ml at 4 °C  
412 using a 10 kDa Centricon Plus-70 centrifugal unit (Merck Millipore, Billerica, Massachusetts, USA).  
413 200  $\mu$ l was used for RNA isolation. After filtering through a 0.22  $\mu$ m filter (Whatman, Dassel,  
414 Germany), 1 ml concentrated conditioned medium (CCM) was used for DG ultracentrifugation.  
415 Fractions of 1 ml were collected and fractions 9-10 pooled. Pooled fractions were diluted to 15 ml  
416 with phosphate-buffered saline (PBS), followed by 3 h ultracentrifugation at 100,000 g and 4 °C using  
417 SW 32.1 Ti rotor (Beckman Coulter, Fullerton, California, USA). Resulting pellets were resuspended  
418 in 100  $\mu$ l PBS and stored at -80 °C until further use. Samples were further diluted in PBS to 200  $\mu$ l for  
419 RNA isolation.

420

421

#### 4.2 Extracellular vesicle quality control

422

423 We have submitted all relevant data of our experiments to the EV-TRACK knowledgebase<sup>21</sup> (EV-  
424 TRACK ID: EV190039).

425

426

##### 4.2.1 Antibodies

427

428 The following antibodies were used for immunostaining: anti-Alix (1:1000, 2171S, Cell Signaling  
429 Technology, Beverly, Massachusetts, USA), anti-TSG101 (1:1000, sc-7964, Santa Cruz Biotechnology,  
430 Dallas, Texas, USA), anti-CD9 (1:1000, D3H4P, Cell Signaling Technology, Beverly, Massachusetts,  
431 USA), anti-THP (1:800, sc-20631, Santa Cruz Biotechnology, Dallas, Texas, USA), anti-Flot-1 (1:1000,  
432 610820, BD Biosciences, Franklin Lakes, New Jersey, USA), anti-Ago2 (1:1000, ab32381, Abcam,  
433 Cambridge, UK), anti-ApoA-1 (1:100, B10, Santa Cruz Biotechnology, Dallas, Texas, USA), sheep anti-  
434 mouse horseradish peroxidase-linked antibody (1:3000, NA931V, GE Healthcare Life Sciences,  
435 Uppsala, Sweden), donkey anti-rabbit horseradish peroxidase-linked antibody (1:4000, NA934V, GE  
436 Healthcare Life Sciences, Uppsala, Sweden).

437

438

##### 4.2.2 Protein analysis

439

440 EV protein concentrations were measured using the fluorometric Qubit Protein Assay  
441 (ThermoFisher, Waltham, Massachusetts, USA). Sample preparation was done by 1:1 dilution with  
442 SDS 0.4%. Protein measurements were performed using the Qubit Fluorometer 3.0 (ThermoFisher,  
443 Waltham, Massachusetts, USA) according to the manufacturer's instructions.

444 ODG fractions were dissolved in reducing sample buffer (0.5 M Tris-HCl (pH 6.8), 40% glycerol, 9.2%  
445 SDS, 3% 2-mercaptoethanol, 0.005% bromophenol blue) and boiled at 95 °C for 5 min. Proteins were  
446 separated by SDS-PAGE (SDS-polyacrylamide gel electrophoresis), transferred to nitrocellulose  
447 membranes (Bio-Rad, Hercules, California, USA), blocked in 5% non-fat milk in PBS with 0.5%  
448 Tween-20 and immunostained. Chemiluminescence substrate (WesternBright Sirius, Advansta,  
449 Menlo Park, California, USA) was added and imaging was performed using the Proxima 2850 Imager  
450 (IsoGen Life Sciences, De Meern, The Netherlands).

451

452

453

#### 4.2.3 Nanoparticle tracking analysis

454 EV samples were analyzed by Nanoparticle tracking analysis (NTA) using a NanoSight LM10  
455 microscope (Malvern Instruments Ltd, Amesbury, UK) equipped with a 405 nm laser. For each  
456 sample, three 60 second videos were recorded at camera level 13. Temperature was monitored during  
457 recording. Recorded videos were analyzed at detection threshold 3 with NTA Software version 3.2  
458 to determine the concentration and size distribution of measured particles with corresponding  
459 standard error. For optimal measurements, samples were diluted with PBS until particle  
460 concentration was within the optimal concentration range for particle analysis ( $3 \times 10^8$ - $1 \times 10^9$ ).

461

462

463

#### 4.2.4 Transmission electron microscopy

464 EV samples were qualitatively and quantitatively analyzed with transmission electron microscopy  
465 (TEM). Samples were deposited on Formvar carbon-coated, glow discharged grids, stained with  
466 uranylacetate and embedded in methylcellulose/uranylacetate. These grids were examined using a  
467 Tecnai Spirit transmission electron microscope (FEI, Eindhoven, The Netherlands) and images were  
468 captured with a Quemas charge-coupled device camera (Olympus Soft Imaging Solutions, Munster,  
469 Germany).

470

471

472

#### 4.3 RNA isolation, spike-in RNA addition and DNase treatment

473 RNA isolation was performed using the miRNeasy Serum/Plasma Kit (Qiagen). In experiment 1,  
474 ePRP and ePPF RNA was isolated from 200  $\mu$ l of platelet-rich and platelet-free plasma from two  
475 healthy donors. Two RNA replicates were included. 2  $\mu$ l of Sequin RNA spikes<sup>16</sup> were added to the  
476 lysate at a dilution of 1/3000 for PFP and 1/250 for PRP, to control for variation in RNA isolation.  
477 After isolation, 2  $\mu$ l of ERCC RNA spikes (ThermoFisher) were added to the eluate at a dilution of  
478 1/25 000 for PFP and 1/5000 for PRP. This allows to estimate the relative concentration of the eluate.  
479 For the ePPF RNA of the healthy donor, used for the spike-in RNA titration experiment (see 4.4), we  
480 used 6 aliquots of 200  $\mu$ l plasma and pooled the RNA after isolation. We did not add Sequin spikes  
481 during RNA isolation. ERCC spikes were added following a titration series, as described in the next  
482 paragraph. Finally, RNA from EVs and their respective biofluids was isolated with the same kit, using  
483 200  $\mu$ l sample input (see also 4.1). No duplicates were included at the level of RNA isolation, no  
484 Sequin spikes were added, and the standard spin columns were replaced by Ultra-Clean Production  
485 (UCP) columns (Qiagen). ERCC spikes were added to the RNA isolation eluate at a dilution of 1/30  
486 000 for plasma and urine and 1/50 for conditioned medium.

487

488

489

#### 4.4 Spike-in RNA titration for assessment of trueness

490 Pooled ePPF RNA (prepared without Sequin spike-in RNA addition) was distributed in five separate  
491 tubes, each containing 12  $\mu$ l RNA. Then, we added 1  $\mu$ l DNase, 1.6  $\mu$ l reaction buffer, 2  $\mu$ l Sequin  
492 spikes and 2  $\mu$ l ERCC spikes to each tube. Both spike-in RNA types were added in a 5-point 1.414-  
493 fold dilution series, in opposing order. For Sequin: 1/15,000, 1/21,277, 1/30,000, 1/42,433 and 1/60,000.  
494 For ERCC: 1/100,000, 1/70,721, 1/50,000, 1/35,461 and 1/25,000.

495

496 *4.5 Total RNA library preparation and sequencing*

497 On the total amount of 12\_μl eluate, gDNA heat-and-run removal was performed by adding 1  
498 μl of HL-dsDNase (ArcticZymes 70800-202, 2\_U/μl) and 1\_μl reaction buffer (ArcticZymes 66001). Of  
499 the resulting volume, 4\_μl was used as input for the total RNA library preparation protocol.  
500 Sequencing libraries were generated using SMARTer Stranded Total RNA-Seq Kit v2 - Pico Input  
501 Mammalian (Takara, 634413). Compared to the manufacturer's protocol, the fragmentation step was  
502 set to 4 min at 94 °C, hereafter the option to start from highly degraded RNA was followed. Library  
503 quality control was performed with the Fragment Analyzer high sense small fragment kit (Agilent  
504 Technologies, sizing range 50 bp-1000 bp). Based on Qubit concentration measurements or KAPA  
505 qPCR, samples were pooled and loaded on the NextSeq 500 (Illumina) with a loading concentration  
506 of 1.1 or 1.2 pM. Note that the 1.2 pM resulted in lower quality reads as the run was slightly  
507 overloaded. Paired end sequencing was performed (2x75 bp) with median depth of 15.3 million reads  
508 per sample. The fastq data is deposited in GEO (GSE131689).

509  
510 *4.6 Sequencing data quality control*

511  
512 The reads with a low quality score (Q30) were discarded, hereafter read duplicates were removed  
513 with Clumpify (BBMap v.37.93, standard settings). The libraries were trimmed using cutadapt  
514 (v.1.16)<sup>22</sup> to remove 3 nucleotides of the 5' end of read 2. To enable a fair comparison, we started data-  
515 analysis from an equal number of reads by subsampling to 1 million trimmed and deduplicated  
516 reads. To assess the quality of the data, the reads were mapped using STAR (v.2.5.3)<sup>23</sup> on the hg38  
517 genome including the full ribosomal DNA (45S, 5.8S and 5S) and mitochondrial DNA sequences. The  
518 parameters of STAR were according to the ENCODE project. Using SAMtools (v1.6)<sup>24</sup>, reads mapping  
519 to the different nuclear chromosomes, mitochondrial DNA and rRNA were extracted and annotated  
520 as exonic, intronic or intergenic. The SMARTer total RNA sequencing data is stranded and processed  
521 accordingly, so strandedness was considered for each analysis step. Gene body coverage was  
522 calculated using the full Ensembl (v91)<sup>25</sup> transcriptome. The coverage per percentile was calculated.

523  
524 *4.7 Quantification of Ensembl and LNCipedia genes, differential abundance analysis and gene set*  
525 *enrichment analysis*

526  
527 Genes were quantified by Kallisto (v.0.43.1)<sup>26</sup> using both Ensembl (v.91)<sup>25</sup> extended with the ERCC  
528 spike and Sequin spike sequences and LNCipedia (v.5.0)<sup>11</sup>. The strandedness of the total RNA-seq  
529 reads was considered by running the -rf-stranded mode. Further processing was done with R  
530 (v.3.5.1) making use of tidyverse (v.1.2.1). A cut-off for filtering noisy genes was set based on an  
531 analysis of single positive and double positive genes. For a cut-off of 4 counts, at least 95% of the  
532 single positive values are filtered out. To measure the biological signal, we first performed differential  
533 expression analysis between the treatment groups using DESeq2 (v.1.20.0)<sup>27</sup>. To identify enriched  
534 gene sets a fsgea (v.1.6.0) analysis was performed, calculating enrichment for the gene sets retrieved  
535 from MSigDB (v.6.2).

536  
537 *4.8 Circular RNA detection*

538  
539 CircRNAs were annotated by using the combination of STAR (v.2.6.0)<sup>23</sup> and CIRCexplorer2 (v2.3.3)<sup>28</sup>.  
540 The settings of STAR (used according to Vo et al.) are slightly different compared to linear mapping<sup>4</sup>.  
541 Human genome hg38 was used for circRNA analysis. CircRNAs were annotated with host gene  
542 names from RefSeq.

543 **5. Figure legends**

544 **Figure 1 Schematic overview of the different experiments**

545 **Figure 2 Read distribution of all libraries differs among samples.** A) Percentage of reads assigned  
546 as too short to map, unique- or multi-mapping quantified with STAR. B) Percentage of reads  
547 derived from nuclear RNA, mitochondrial RNA and ribosomal RNA per sample quantified with  
548 STAR. B) Percentage of the reads originating from nuclear chromosomes derived from exonic,  
549 intronic and intergenic regions per sample quantified with STAR.

550 **Figure 3 Spike-in RNA based assessment of relative RNA concentration and trueness.** A) Relative  
551 RNA concentration estimation. B) Relationship between expected and observed  $\log_2$  fold changes  
552 shows an overall good correlation. C) The  $\log_2$  fold change differences are higher in spikes with low  
553 counts. D) Cumulative distributions of  $\log_2$  fold change differences demonstrate good concordance  
554 between expected and observed differences.

555 **Figure 4 RNA isolation replicates of ePRP and ePFP show high repeatability.** A) ePRP and B)  
556 ePFP replicate correlation with filtered (counts < 4, red) and retained genes (counts  $\geq$  4, green)  
557 resulted in high Pearson correlation of 0.912 and 0.948, respectively.

558 **Figure 5 Cumulative distributions of the  $\log_2$  ratio for all replicate pairs with their respective**  
559 **values of the area left of the curve.** A) ePRP and ePFP RNA isolation replicates of two donors. B)  
560 Library preparation replicates of CM, CM-EV, cPFP, cPFP-EV, urine and urine-EV.

561 **Figure 6 The number of genes differs among sample types.** A) Number of genes (counts  $\geq$ 4)  
562 detected in ePRP and ePFP. B) Read consumption of the genes ranked by abundance. B) Number of  
563 genes (counts  $\geq$ 4) detected in CM, CM-EV, cPFP, cPFP-EV, urine and urine-EV.

564 **Figure 7 Detected gene-biotypes differ among sample types.** A) Percentage of exonic reads  
565 attributed to the different biotypes per sample quantified with Kallisto. B-C) Detected number of  
566 genes per biotype for all samples.

567 **Figure 8 Non-coding RNAs, both linear and circular, are detected in total RNA sequencing**  
568 **libraries.** A) Number of lncRNAs quantified based on LNCipedia. B) Number of circular RNAs  
569 detected with CircExplorer2.

570 **Figure 9 Gene detection overlap and correlation between EVs and their biofluid of origin differ**  
571 **among the sample biotypes.** Euler diagrams of A) CM and CM-EV, B) cPFP and cPFP-EV, and C)  
572 urine and urine-EV. Correlation of overlapping (gray) and specific genes (colored) between EVs  
573 and their origin for D) CM and CM-EV, E) cPFP and cPFP-EV, and F) urine and urine-EV.

574 *Supplemental Figure 1 Read duplication levels are markedly different among different biomaterials.*

575 *Supplemental Figure 2a Characterization of EV from urine and plasma samples.* Proteins are analyzed by  
576 western blot using specific EV markers (ALIX, tsg101, CD9 and flotillin-1) and non-EV markers (THP  
577 and ApoA-1). EV samples (density gradient fractions 9-10) are enriched in EV proteins and depleted  
578 for contaminants. EVs were qualitatively and quantitatively analyzed by electron microscopy and  
579 nanoparticle tracking analysis.

580 *Supplemental Figure 2b Characterization of EV from MCF-7 GFP-Rab27b cells.* Proteins are analyzed by  
581 performing western blot using specific EV markers (ALIX, tsg101 and CD9) and non-EV markers  
582 (Ago2). EV samples (density gradient fractions 9-10) are enriched in EV proteins and depleted for  
583 contaminants. EVs were qualitatively and quantitatively analyzed by electron microscopy and  
584 nanoparticle tracking analysis.

585  
586 *Supplemental Figure 3. Percentage of reads originating from the sense strand to demonstrate good strandedness*  
587 *of the kit.*

588  
589 *Supplemental Figure 4 RNA fragment size distribution shows shorter lengths in plasma derived libraries.*

590  
591 *Supplemental Figure 5 Good concordance between expected concentrations and observed TPMs. LP = library*  
592 *prep replicate.*

593  
594 *Supplemental Figure 6 Relative RNA concentration assessed by spike-in RNA (not corrected for original*  
595 *biofluid input volumes).*

596  
597 *Supplemental Figure 7 t-SNE plots demonstrate the (dis)similarity of the sample biotypes.*

598  
599 *Supplemental Figure 8 Log<sub>10</sub> counts of the 20 most abundant genes per sample.*

600  
601 *Supplemental Figure 9 Count distributions per sample.*

602  
603 *Supplemental Figure 10 Gene body coverage shows typical total RNA sequencing coverage of fragmented RNA.*

604  
605 *Supplemental Figure 11 Overlap of expressed genes for ePRP and eFPF. The ePRP unique genes show an*  
606 *equal distribution compared to the overlapping genes, while the eFPF unique genes are lower*  
607 *distributed.*

608

## 609 **Supplementary Materials**

### 610 **Supplemental Figures**

#### 611 **Author Contributions:**

612 **Funding:** Celine Everaert and Hetty Helmsmoortel are supported by the FWO.

#### 613 **Acknowledgments:**

614 **Conflicts of Interest:** The authors declare not conflict of interest.

## 615 **References**

616 1. Norwitz, E. R. & Levy, B. Noninvasive Prenatal Testing: The Future Is Now. *Rev. Obstet. Gynecol.*  
617 *6*, 48–62 (2013).

618 2. Siravegna, G., Marsoni, S., Siena, S. & Bardelli, A. Integrating liquid biopsies into the management  
619 of cancer. *Nat. Rev. Clin. Oncol.* **14**, 531–548 (2017).

620 3. Buschmann, D. *et al.* Toward reliable biomarker signatures in the age of liquid biopsies - how to  
621 standardize the small RNA-Seq workflow. *Nucleic Acids Res.* **44**, 5995–6018 (2016).

622 4. Vo, J. N. *et al.* The Landscape of Circular RNA in Cancer. *Cell* **176**, 869-881.e13 (2019).

623 5. Qin, Y. *et al.* High-throughput sequencing of human plasma RNA by using thermostable group II  
624 intron reverse transcriptases. *RNA* **22**, 111–128 (2016).

625 6. Nikitina, A. S. *et al.* Datasets for next-generation sequencing of DNA and RNA from urine and  
626 plasma of patients with prostate cancer. *Data Brief* **10**, 369–372 (2016).

- 627 7. Galvanin, A. *et al.* Diversity and heterogeneity of extracellular RNA in human plasma. *Biochimie*  
628 (2019). doi:10.1016/j.biochi.2019.05.011
- 629 8. Akat, K. M. *et al.* Detection of circulating extracellular mRNAs by modified small-RNA-  
630 sequencing analysis. *JCI Insight* **4**, (2019).
- 631 9. Giraldez, M. D. *et al.* Phospho-RNA-seq: a modified small RNA-seq method that reveals  
632 circulating mRNA and lncRNA fragments as potential biomarkers in human plasma. *EMBO J.* **38**,  
633 (2019).
- 634 10. Gaidatzis, D., Burger, L., Florescu, M. & Stadler, M. B. Analysis of intronic and exonic reads in  
635 RNA-seq data characterizes transcriptional and post-transcriptional regulation. *Nat. Biotechnol.* **33**,  
636 722–729 (2015).
- 637 11. Volders, P.-J. *et al.* LNCipedia 5: towards a reference set of human long non-coding RNAs. *Nucleic*  
638 *Acids Res.* **47**, D135–D139 (2019).
- 639 12. Savelyeva, A. V. *et al.* Variety of RNAs in Peripheral Blood Cells, Plasma, and Plasma Fractions.  
640 *BioMed Res. Int.* **2017**, (2017).
- 641 13. Freedman, J. E. *et al.* Diverse human extracellular RNAs are widely detected in human plasma.  
642 *Nat. Commun.* **7**, (2016).
- 643 14. Hill, A. F. *et al.* ISEV position paper: extracellular vesicle RNA analysis and bioinformatics. *J.*  
644 *Extracell. Vesicles* **2**, (2013).
- 645 15. Page, K., Shaw, J. A. & Guttery, D. S. The liquid biopsy: towards standardisation in preparation  
646 for prime time. *Lancet Oncol.* **20**, 758–760 (2019).
- 647 16. Hardwick, S. A. *et al.* Spliced synthetic genes as internal controls in RNA sequencing experiments.  
648 *Nat. Methods* **13**, 792–798 (2016).
- 649 17. Tulkens, J. *et al.* Increased levels of systemic LPS-positive bacterial extracellular vesicles in patients  
650 with intestinal barrier dysfunction. *Gut* gutjnl-2018-317726 (2018). doi:10.1136/gutjnl-2018-317726
- 651 18. Van Deun, J. *et al.* The impact of disparate isolation methods for extracellular vesicles on  
652 downstream RNA profiling. *J. Extracell. Vesicles* **3**, (2014).
- 653 19. Vergauwen, G. *et al.* Confounding factors of ultrafiltration and protein analysis in extracellular  
654 vesicle research. *Sci. Rep.* **7**, 2704 (2017).

- 655 20.Hendrix, A. *et al.* Effect of the Secretory Small GTPase Rab27B on Breast Cancer Growth, Invasion,  
656 and Metastasis. *JNCI J. Natl. Cancer Inst.* **102**, 866–880 (2010).
- 657 21.Ev-Track Consortium *et al.* EV-TRACK: transparent reporting and centralizing knowledge in  
658 extracellular vesicle research. *Nat. Methods* **14**, 228–232 (2017).
- 659 22.Martin, M. Cutadapt removes adapter sequences from high-throughput sequencing reads.  
660 *EMBnet.journal* **17**, 10 (2011).
- 661 23.Dobin, A. *et al.* STAR: Ultrafast universal RNA-seq aligner. *Bioinformatics* **29**, 15–21 (2013).
- 662 24.Li, H. *et al.* The Sequence Alignment/Map format and SAMtools. *Bioinformatics* **25**, 2078–2079  
663 (2009).
- 664 25.Zerbino, D. R. *et al.* Ensembl 2018. *Nucleic Acids Res.* **46**, D754–D761 (2018).
- 665 26.Bray, N. L., Pimentel, H., Melsted, P. & Pachter, L. Near-optimal probabilistic RNA-seq  
666 quantification. *Nat. Biotechnol.* **34**, 525–527 (2016).
- 667 27.Love, M. I., Huber, W. & Anders, S. Moderated estimation of fold change and dispersion for RNA-  
668 seq data with DESeq2. *Genome Biol.* **15**, 550 (2014).
- 669 28.Zhang, X. O. *et al.* Diverse alternative back-splicing and alternative splicing landscape of circular  
670 RNAs. *Genome Res.* **26**, 1277–1287 (2016).
- 671

A - experiment 1: plasma types

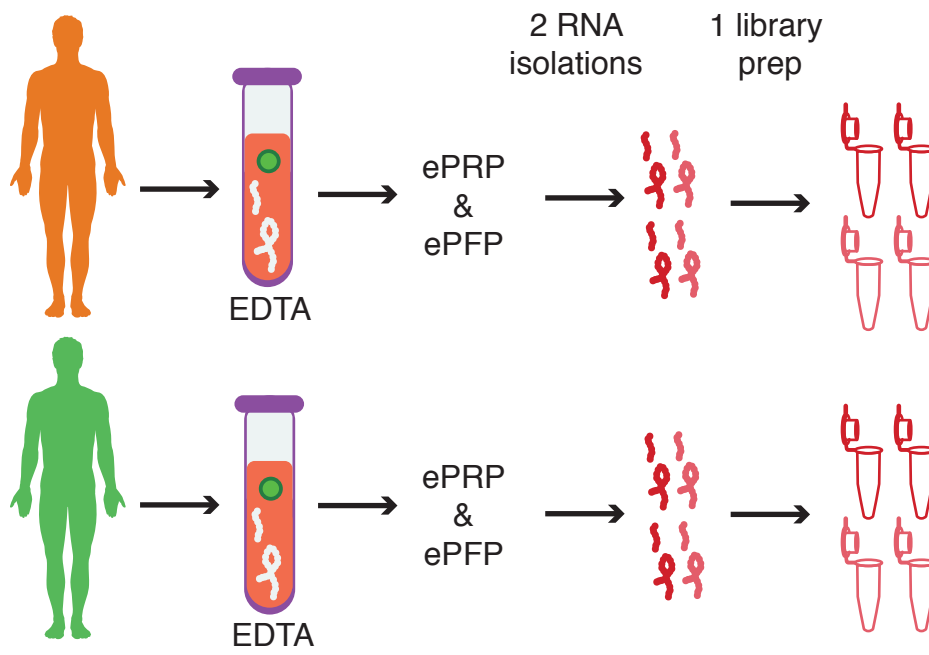

B - experiment 2: biofluids and EVs

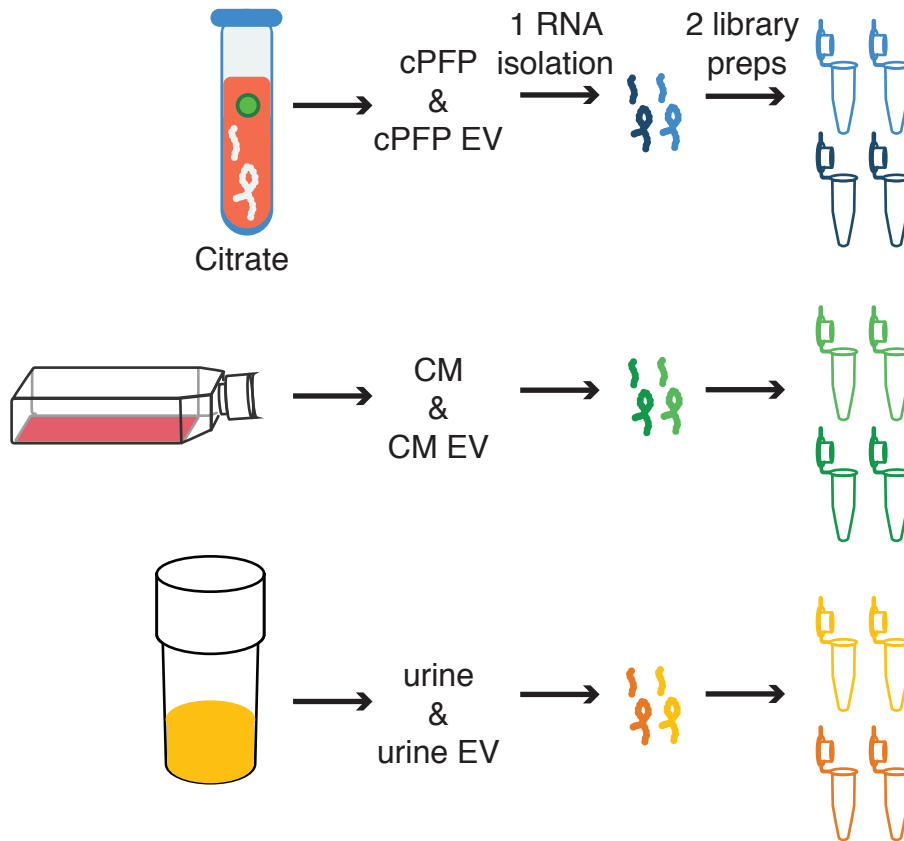

C - experiment 3: spike-in RNA series

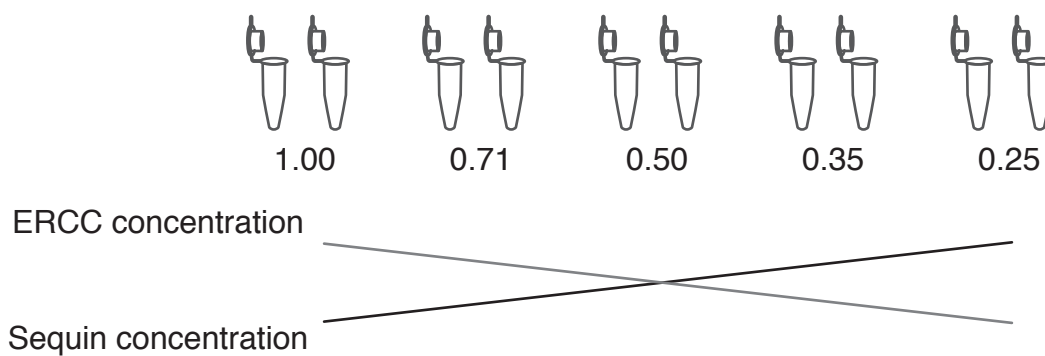



A

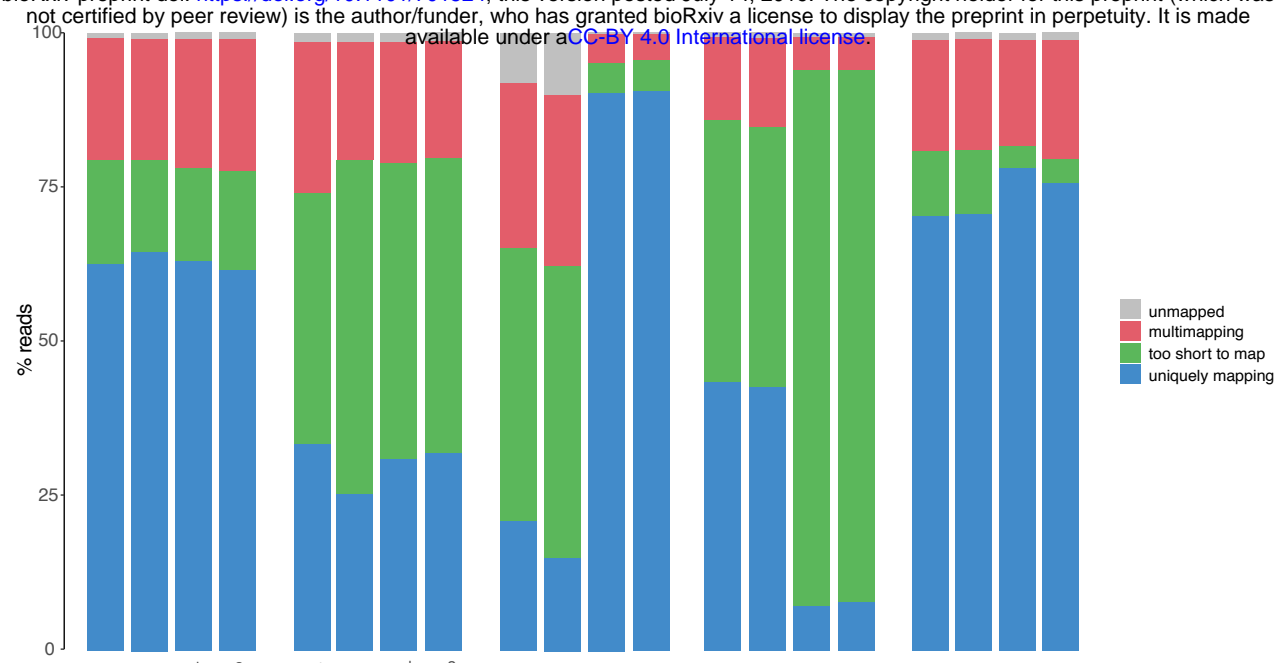

B

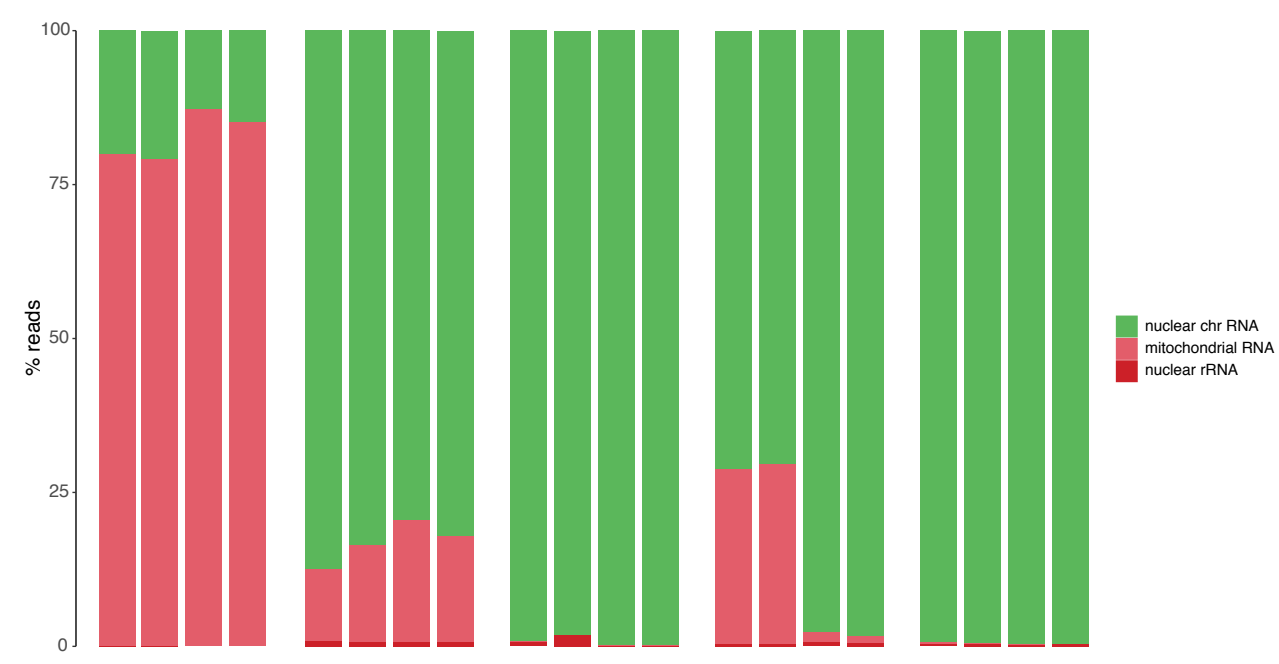

C

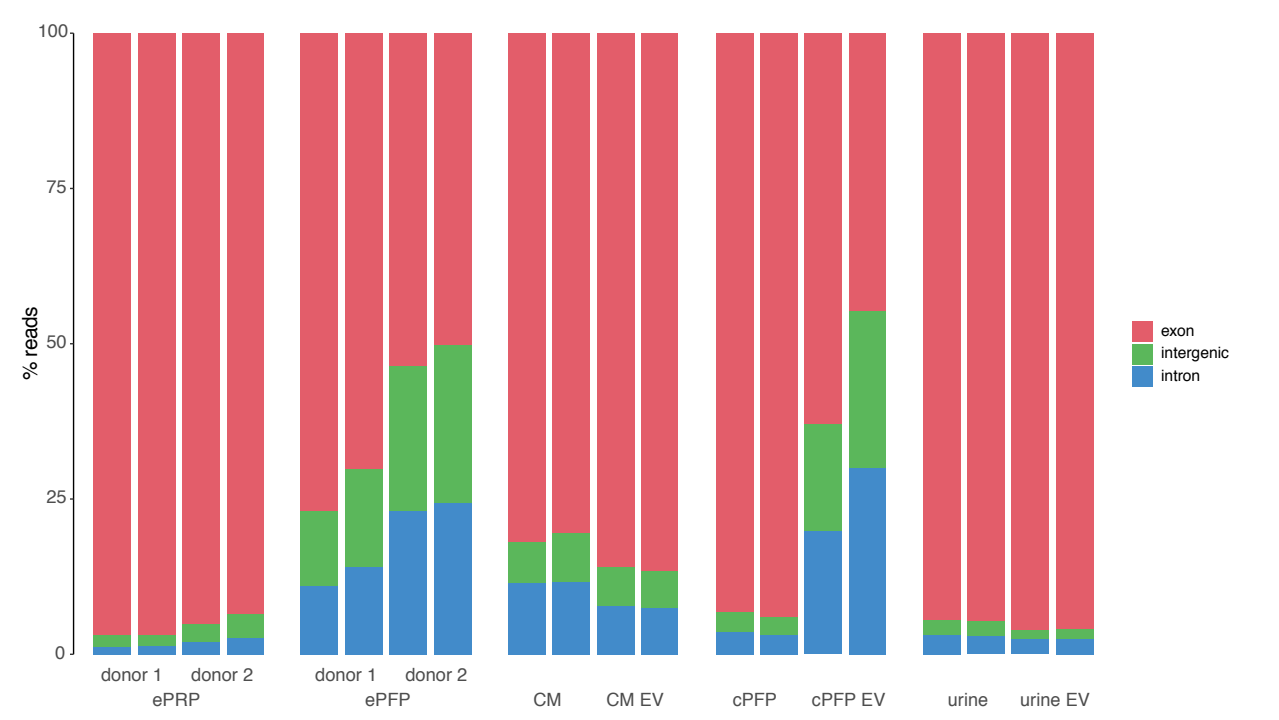

A

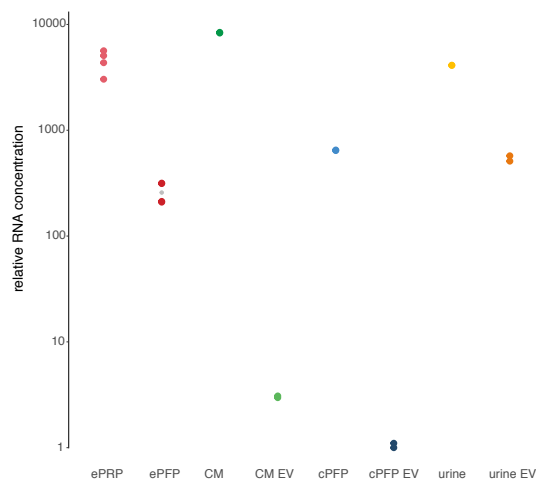

D

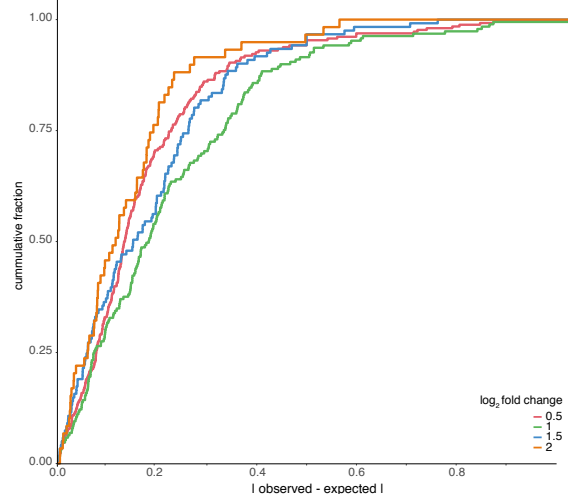

B

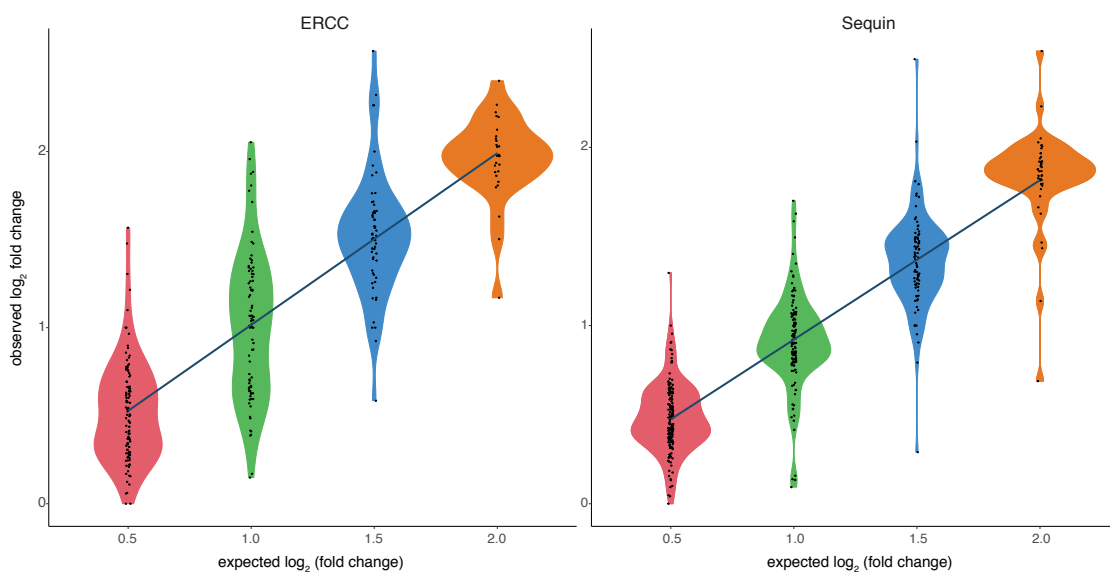

C

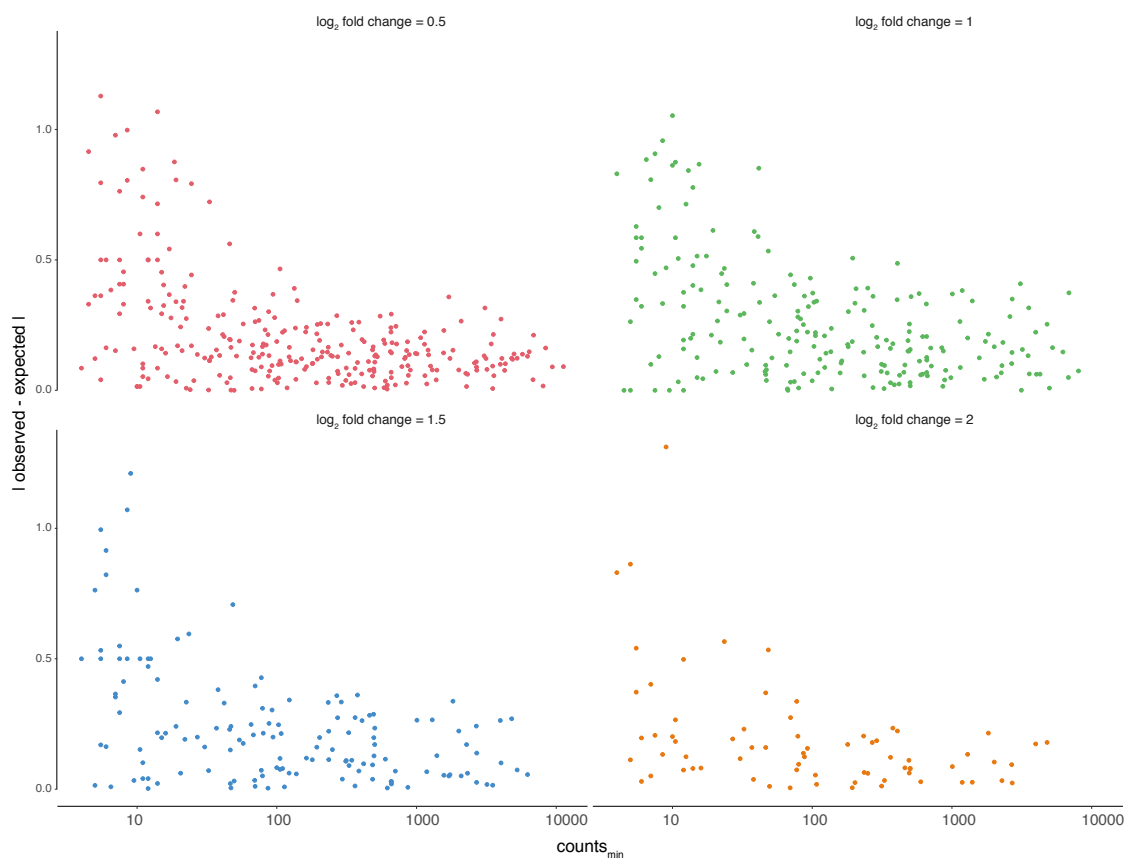

Figure 4

A

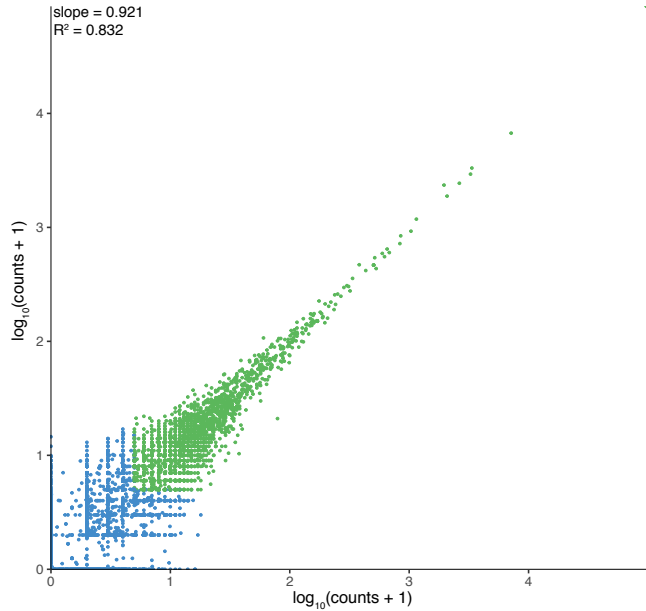

B

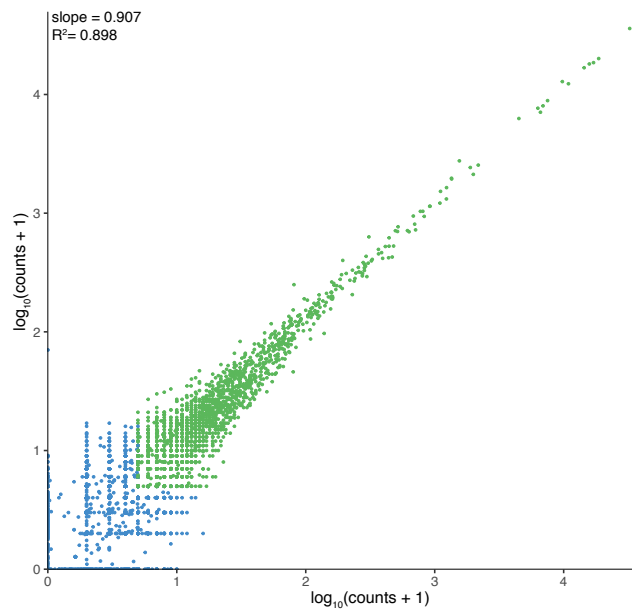

Figure 5

A

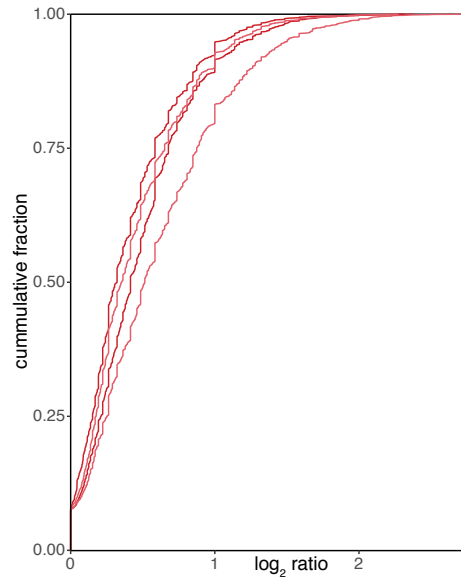

B

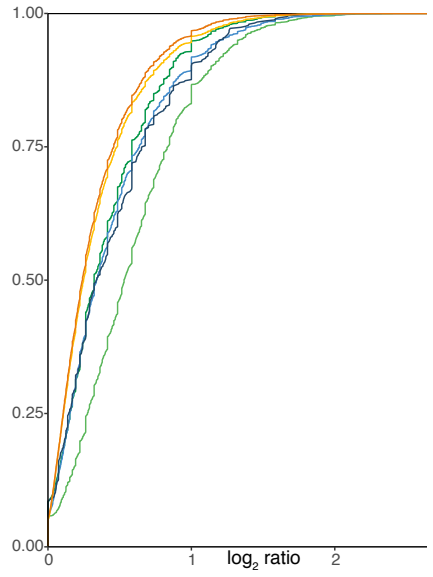

C

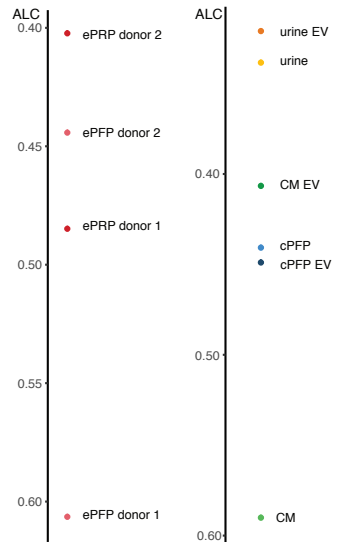

Figure 6

A

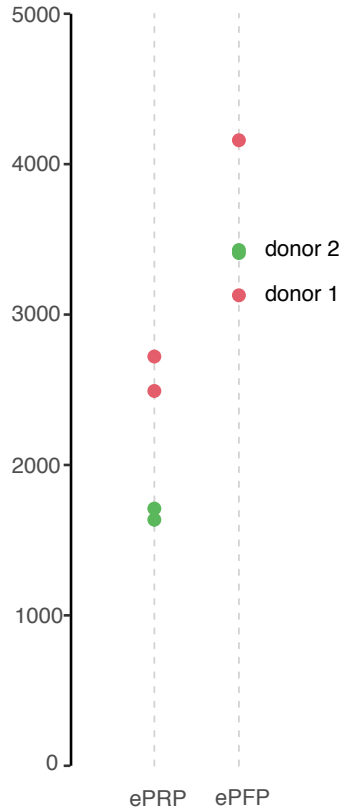

B

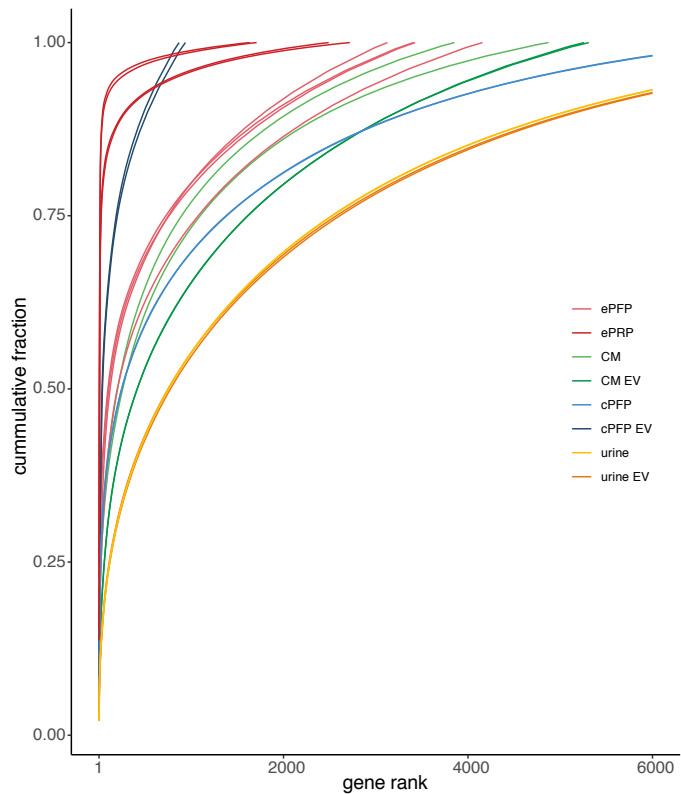

C

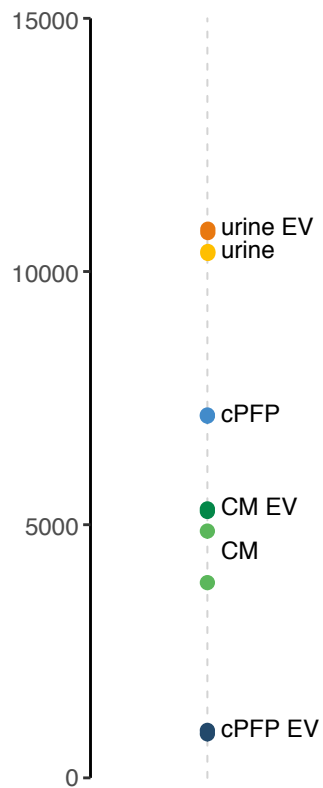

Figure 7

A

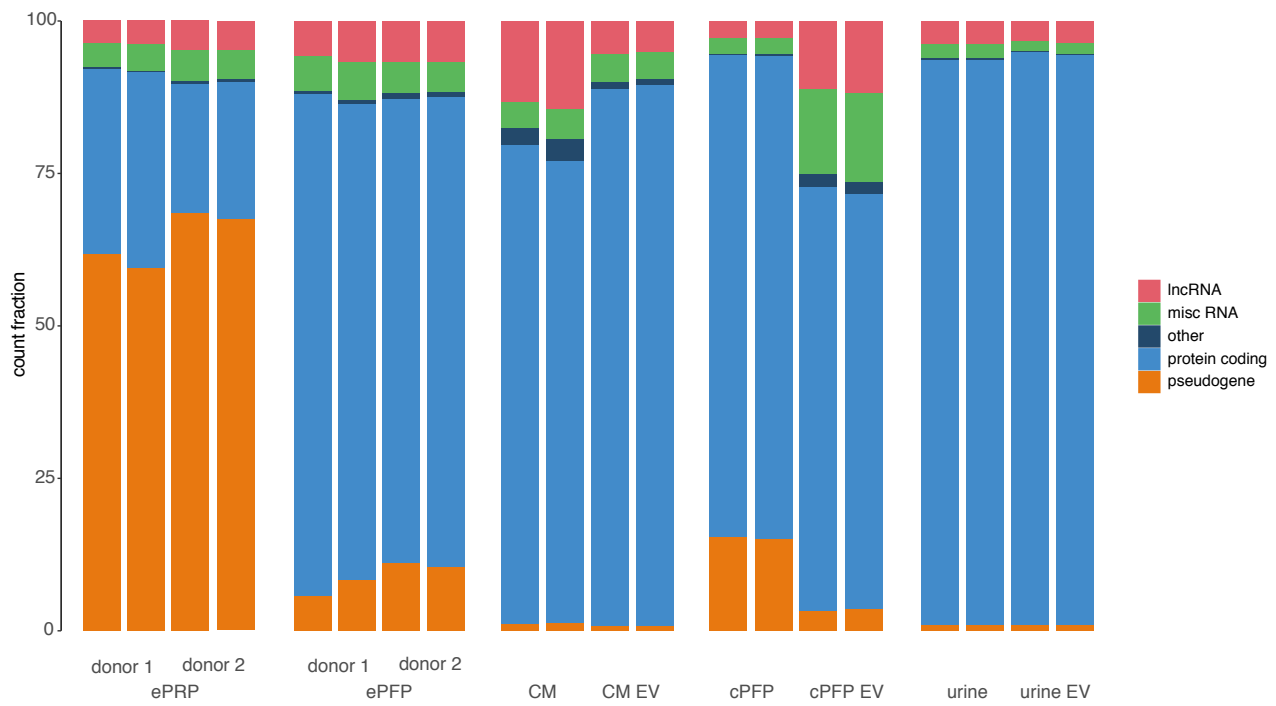

B

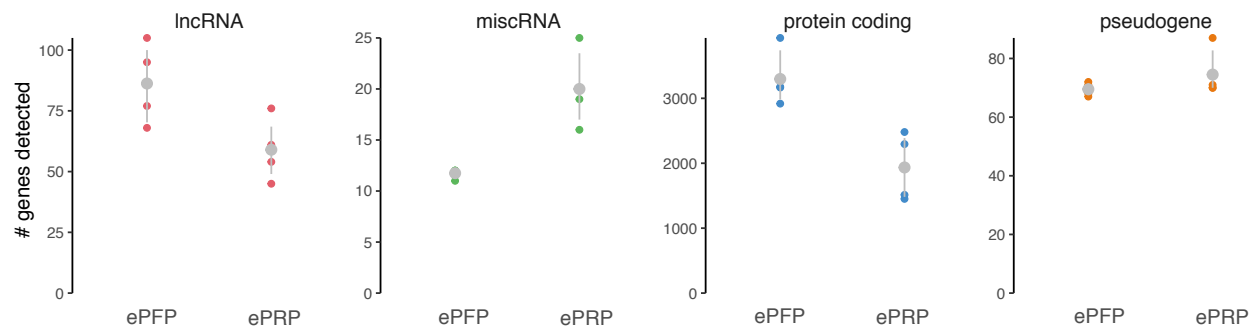

C

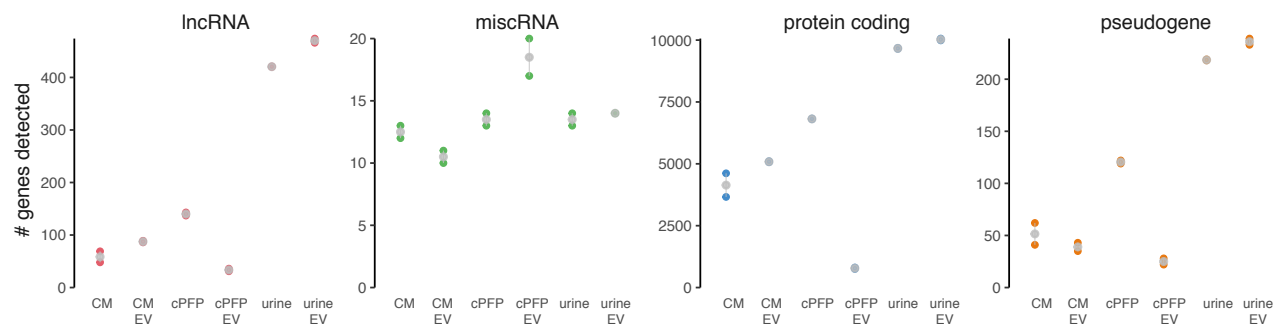

Figure 8

A

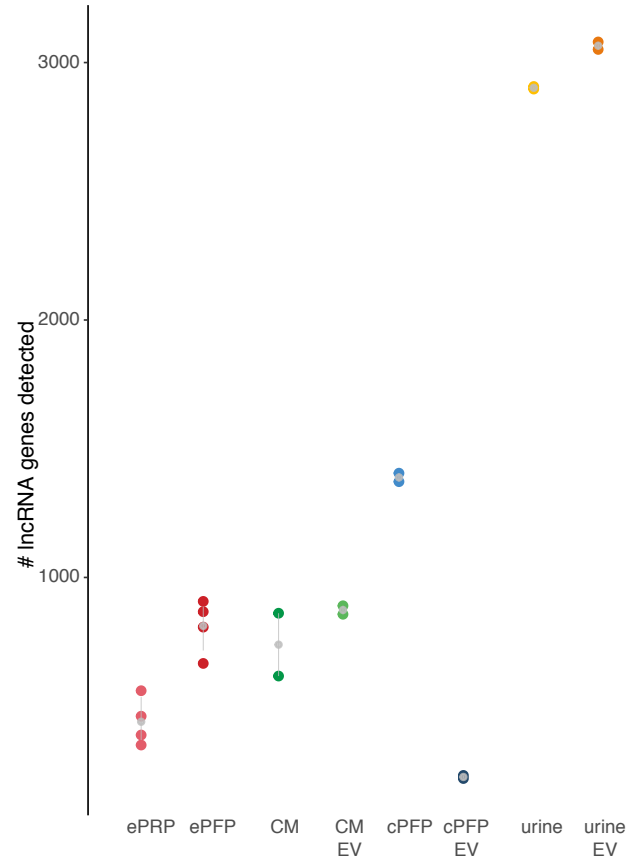

B

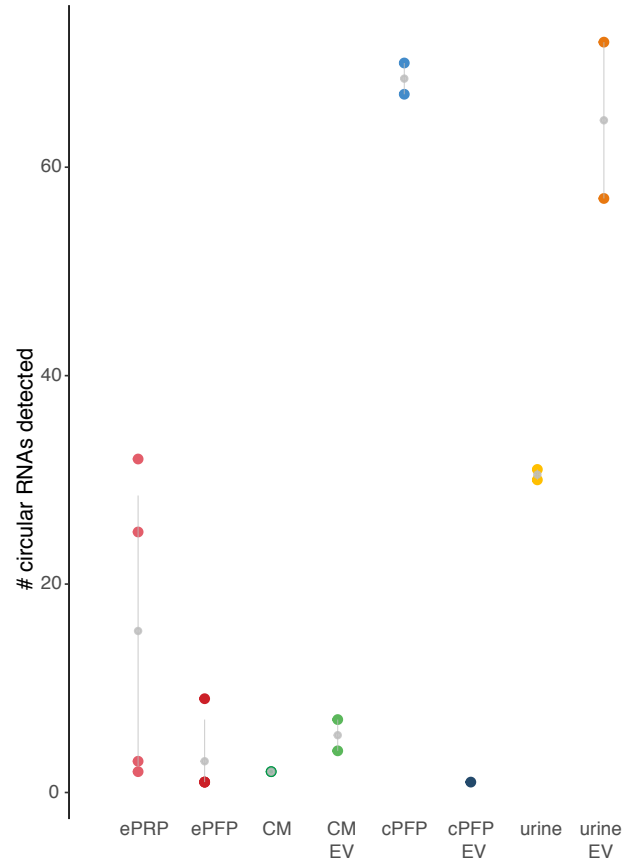

A

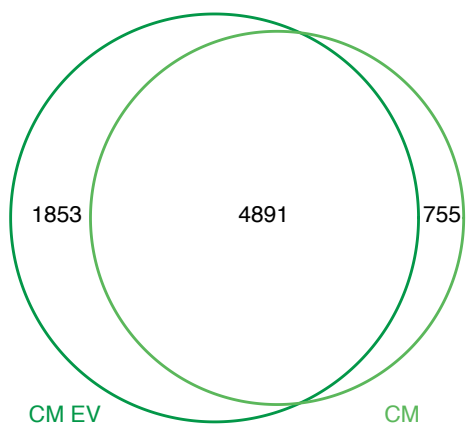

B

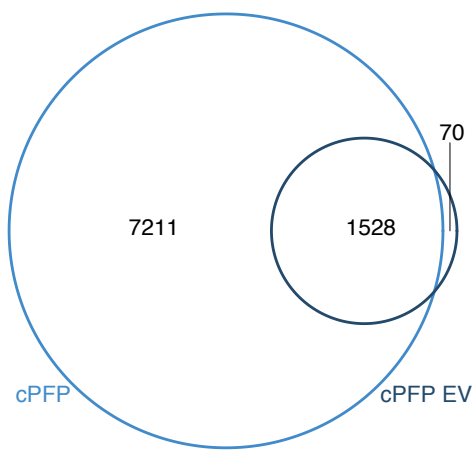

C

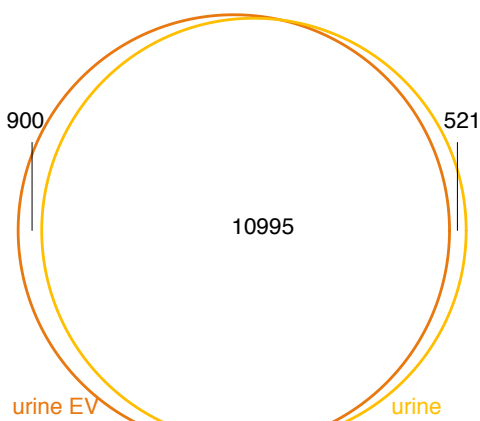

E

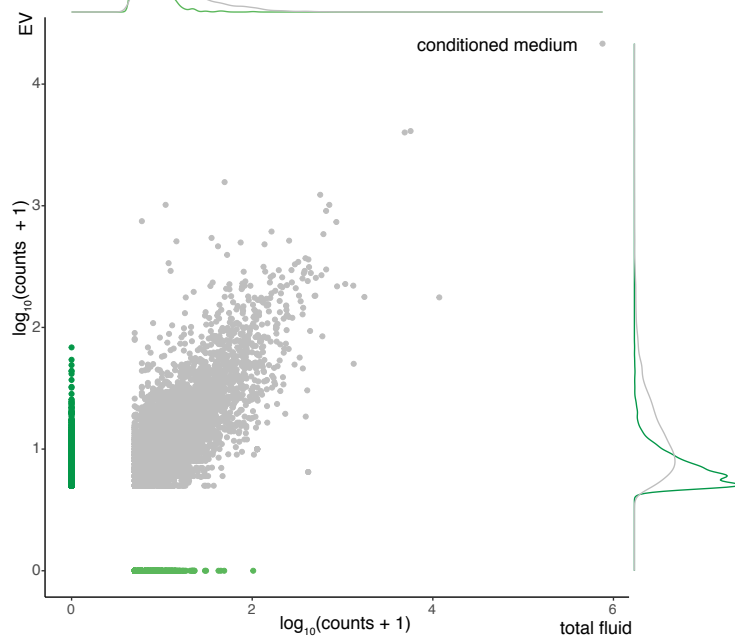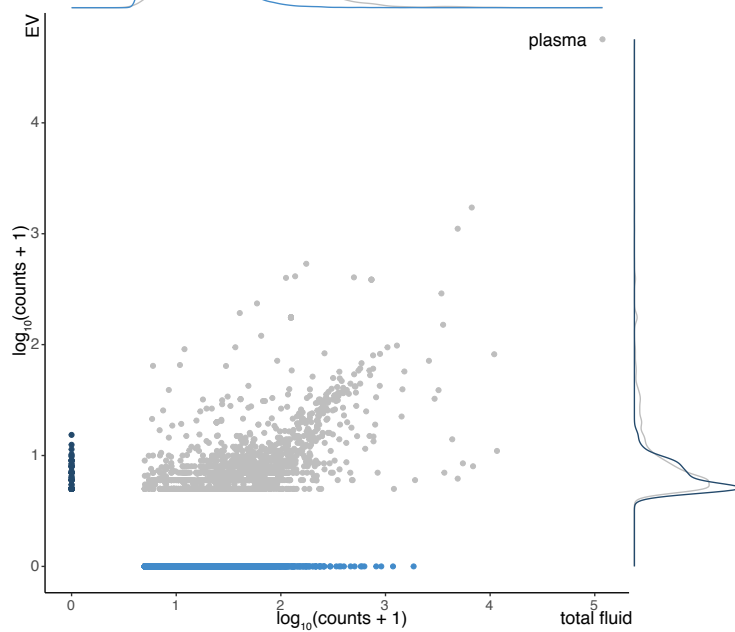

F

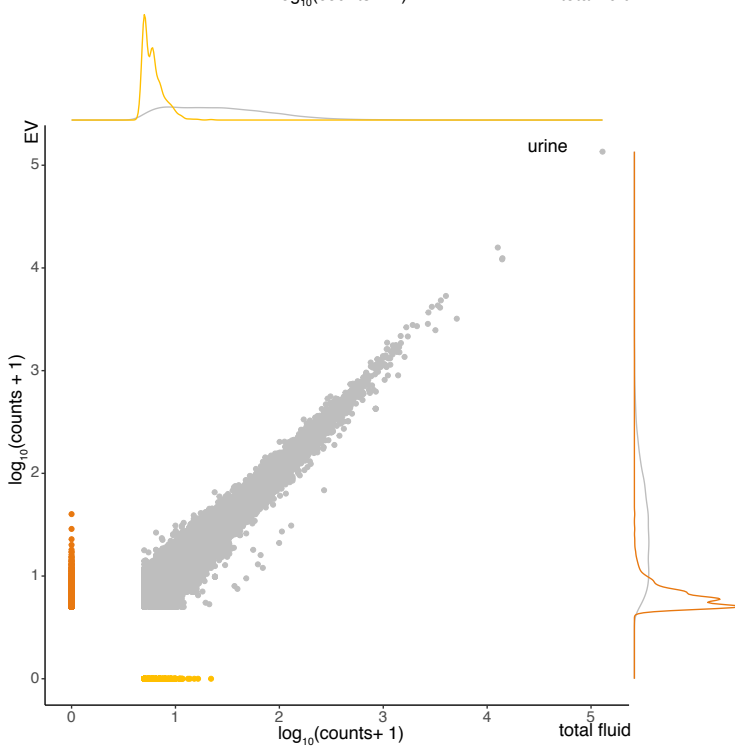

Source: https://www.biorxiv.org/content/10.1101/701524v1.full.pdf
